# Supplementary material for: HIV testing behaviour and associated factors in men who have sex with men by level of urbanisation: a cross-sectional study in the Netherlands
Source: HighWire-hosted journal article supplement (doi:10.1136/bmjopen-2021-049175), 2022-01-01
Supplement: bmjopen-2021-049175supp001_data_supplement.pdf [file bmjopen-2021-049175supp001_data_supplement.pdf]

**Supplement 1. MSM included and excluded in the study**

|                         | Included<br>n (%) | Excluded<br>n (%) | P-value             |
|-------------------------|-------------------|-------------------|---------------------|
| Mean age                | 36                | 36                | 0.44 ^              |
| Migration<br>background |                   |                   | 0.03 <sup>+</sup>   |
| Western                 | 263 (6.9)         | 189 (7.9)         |                     |
| Non-western             | 417 (10.9)        | 301 (12.6)        |                     |
| Dutch                   | 3,135 (82.2)      | 1,900 (79.5)      |                     |
| Self-identification     |                   |                   | <0.001 <sup>+</sup> |
| Homosexual              | 3,298 (86.4)      | 1,963 (82.1)      |                     |
| Bisexual/other          | 517 (13.6)        | 427 (17.9)        |                     |
| <b>Total</b>            | <b>3,815</b>      | <b>2,390</b>      |                     |

^ Independent T-test, <sup>+</sup> Chi2-test
