# Supplementary material for: HIV testing behaviour and associated factors in men who have sex with men by level of urbanisation: a cross-sectional study in the Netherlands
Source: HighWire-hosted journal article supplement (doi:10.1136/bmjopen-2021-049175), 2022-01-01
Supplement: bmjopen-2021-049175supp002_data_supplement.pdf [file bmjopen-2021-049175supp002_data_supplement.pdf]

**Supplement 2.** Factors associated with never or recent HIV testing among MSM who live in high and non-high urbanized areas

|                             | Never tested (vs. Recent tested)                                                                                    |                                                                                                                     | Not recent (vs. Recent tested)                                     |                                                                |
|-----------------------------|---------------------------------------------------------------------------------------------------------------------|---------------------------------------------------------------------------------------------------------------------|--------------------------------------------------------------------|----------------------------------------------------------------|
|                             | Non-highly urbanized                                                                                                | Highly urbanized                                                                                                    | Non-highly urbanized                                               | Highly urbanized                                               |
| Age                         | age <25 years (versus age >42 years), <u>Inversely associated</u> was age between 25 and 42 (versus age >42 years). | age <25 years (versus age > 42 years), <u>inversely associated</u> was age between 25 and 42 (versus age >42 years) | <u>Inversely associated</u> was age <43 (versus age >42 years)     | <u>inversely associated</u> was age below 43 (versus above 42) |
| Self-identification         | self-identification as bisexual (versus homosexual)                                                                 | self-identification as bisexual (versus homosexual)                                                                 |                                                                    |                                                                |
| Sex partner <6 months       | having 0-1, or 2-5 sex partners in the past six months (versus >5)                                                  | having 0-1, or 2-5 sex partners in the past six months (versus >5)                                                  | having 0-1, or 2-5 sex partners in the past six months (versus >5) | 0-1, or 2-5 sex partners in the past six months (versus >5)    |
| Condomless anal intercourse | no condomless anal intercourse in the past six months                                                               | no condomless anal intercourse in the past six months                                                               |                                                                    |                                                                |
| Notified for HIV            | ever being notified for HIV                                                                                         | ever being notified for HIV                                                                                         | ever being notified for HIV                                        | ever being notified for HIV                                    |
| HIV severity                |                                                                                                                     |                                                                                                                     | high HIV severity perception                                       |                                                                |
| HIV risk perception         | a lower HIV risk perception                                                                                         |                                                                                                                     |                                                                    |                                                                |
| Number of gay friends       | reporting a lower share of gay people among friends                                                                 |                                                                                                                     | reporting a lower share of gay people among friends.               |                                                                |
