# Supplementary material for: HIV testing behaviour and associated factors in men who have sex with men by level of urbanisation: a cross-sectional study in the Netherlands
Source: HighWire-hosted journal article supplement (doi:10.1136/bmjopen-2021-049175), 2022-01-01
Supplement: bmjopen-2021-049175supp003_data_supplement.pdf [file bmjopen-2021-049175supp003_data_supplement.pdf]

**Supplement 3.** Reasons for not HIV testing among MSM who never tested, per urbanization level

|                                                                              | <b>Total</b> | <b>High urban*</b> | <b>Non-high-urban*</b> |
|------------------------------------------------------------------------------|--------------|--------------------|------------------------|
| <b>Not feel at (moderate or high) HIV risk</b>                               | 347 (47.1)   | 92 (45.3)          | 255 (47.8)             |
| <b>Absence of symptoms</b>                                                   | 123 (16.7)   | 33 (16.3)          | 90 (16.9)              |
| <b>Expected negative reactions from social environment (expected stigma)</b> | 60 (8.1)     | 18 (8.9)           | 42 (7.9)               |
| <b>Other reasons (various) or unknown</b>                                    | 207 (28.1)   | 60 (29.6)          | 147 (27.5)             |

\*Reasons for not testing were not different per urbanization level ( $p=0.89$ )
